# Supplementary material
Source: Springer Nature journal article supplement (https://www.springermedizin.de/resource/supplementary/12889_2013_6855_MOESM1_ESM.pdf/9499116)
Supplement: MOESM1 [file 9499116]

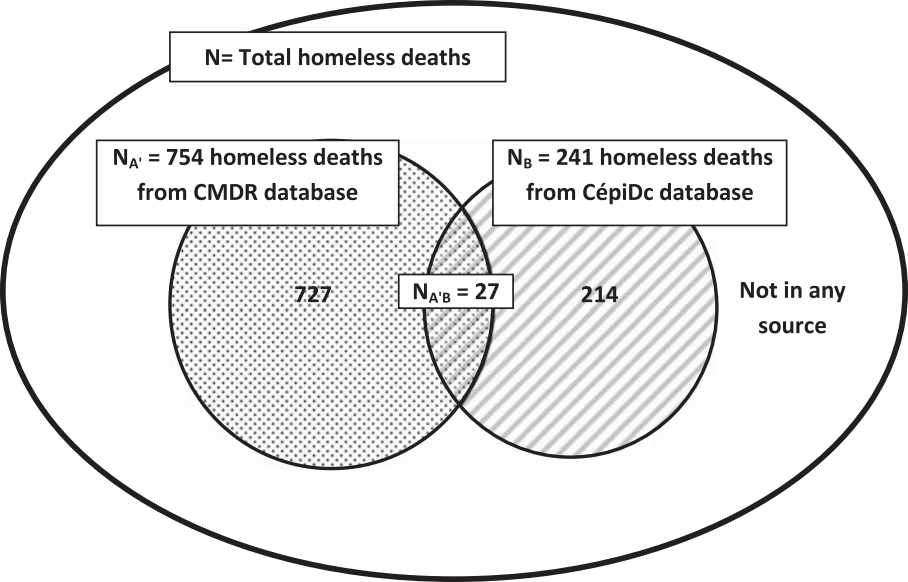

**N= Total homeless deaths**

**$N_{A'}$  = 754 homeless deaths  
from CEMDR database**

**$N_B$  = 241 homeless deaths  
from CépiDc database**

**727**

**$N_{A'B}$  = 27**

**214**

**Not in any  
source**
